# Supplementary material for: Total synthesis of a potent hybrid of the anticancer natural products dictyostatin and discodermolide
Source: Royal Society of Chemistry journal article supplement (doi:10.1039/b811575c), 2008-01-01

*Electronic Supporting Information*

**Total Synthesis of a Potent Hybrid of the Anticancer Natural  
Products Dictyostatin and Discodermolide**

Ian Paterson,\*<sup>a</sup> Guy J. Naylor<sup>a</sup> and Amy E. Wright<sup>b</sup>

<sup>a</sup> *University Chemical Laboratory, Lensfield Road, Cambridge, CB2 1EW, United  
Kingdom,* <sup>b</sup> *Harbour Branch Oceanographic Institution at Florida Atlantic  
University, 5600 US 1 North, Ft. Pierce, FL 34946, USA*

<sup>1</sup>H and <sup>13</sup>C NMR Data for  
Compounds **13 – 15** and **3**

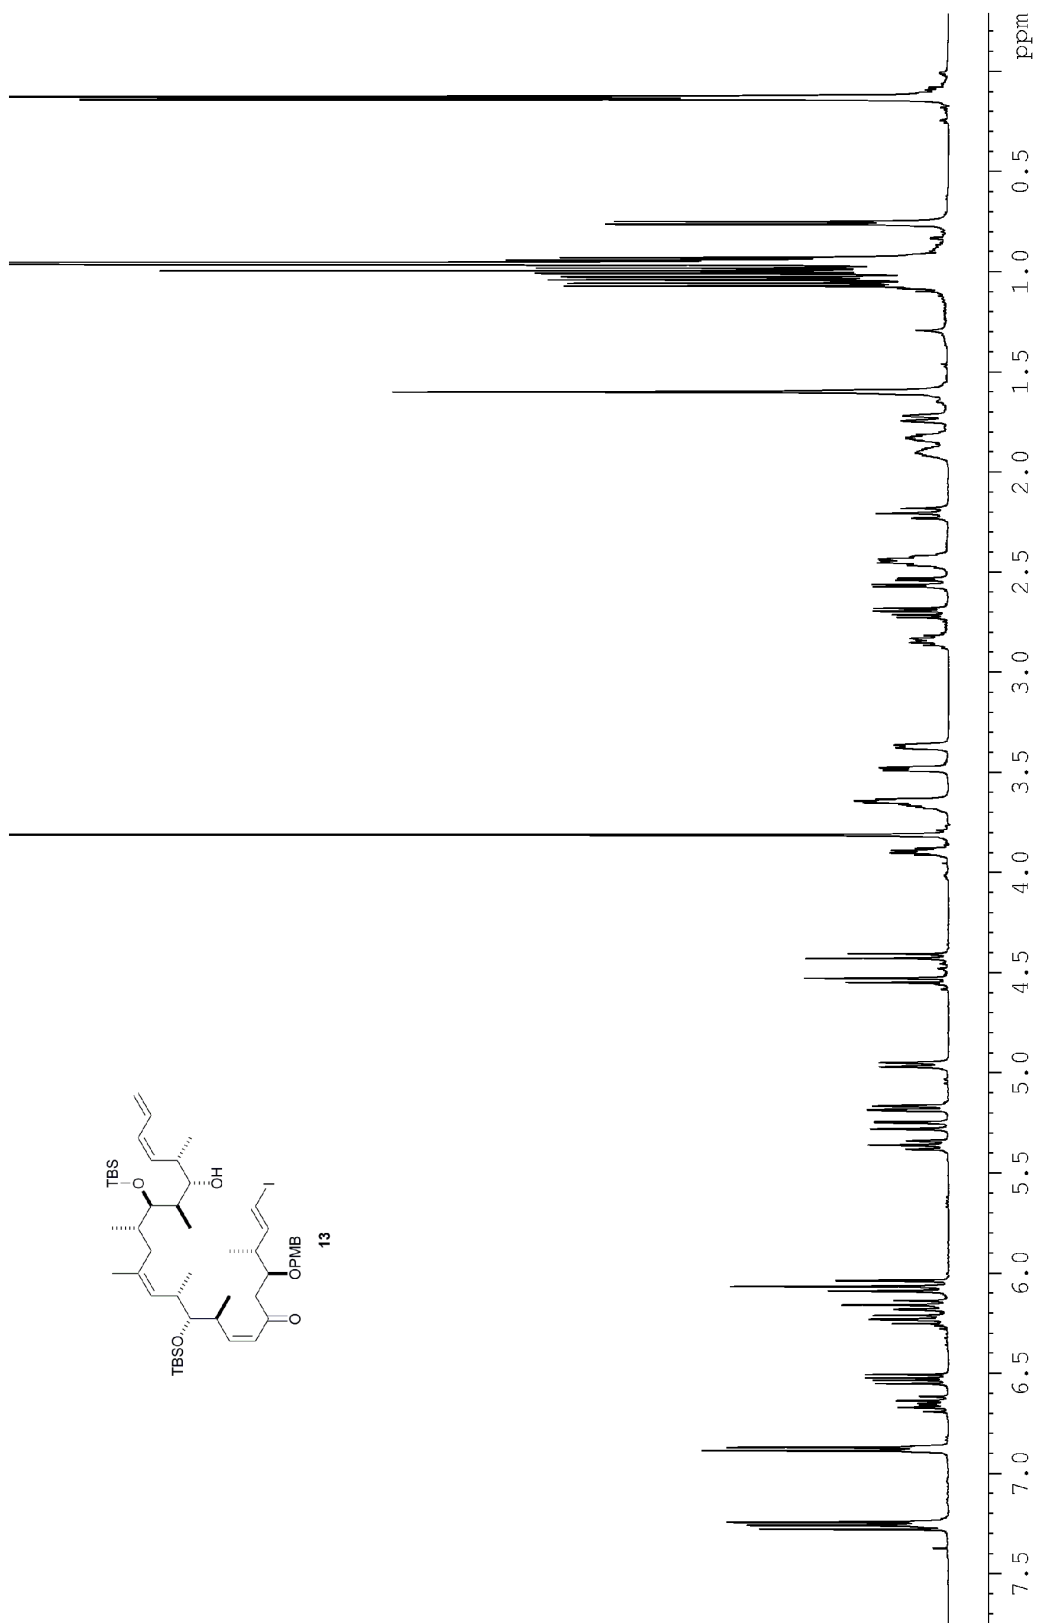

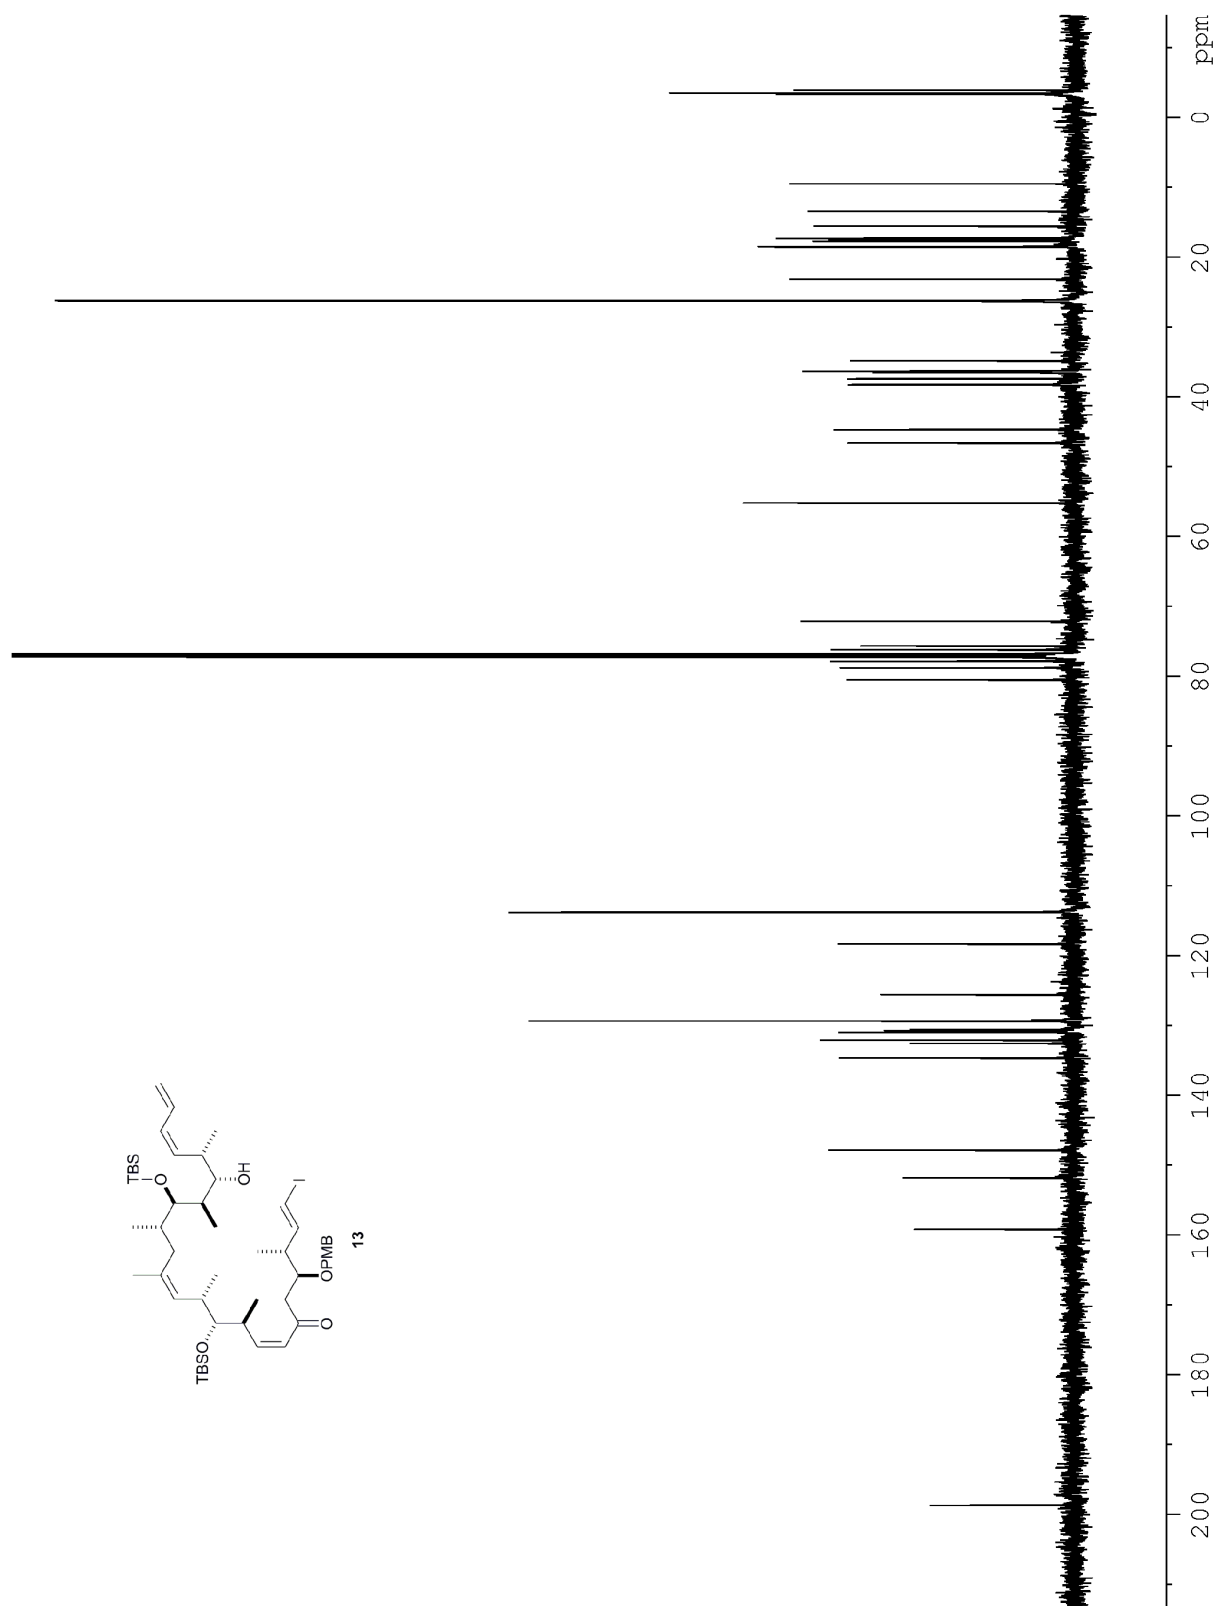

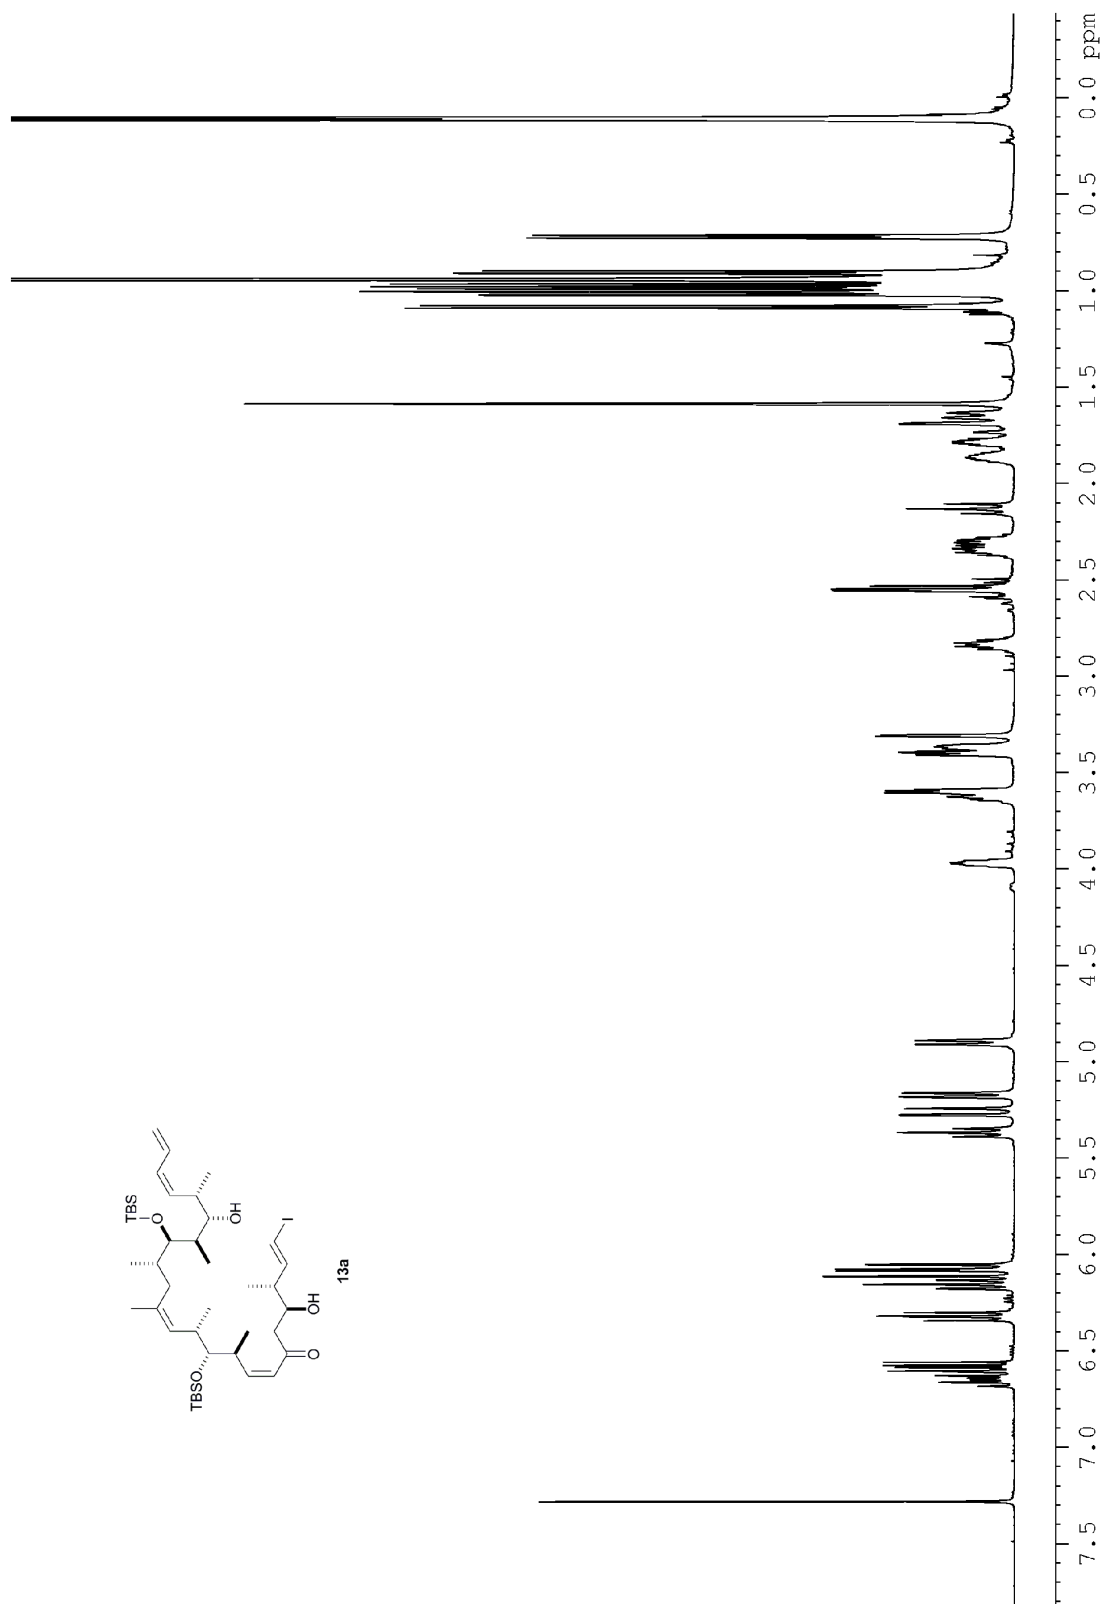

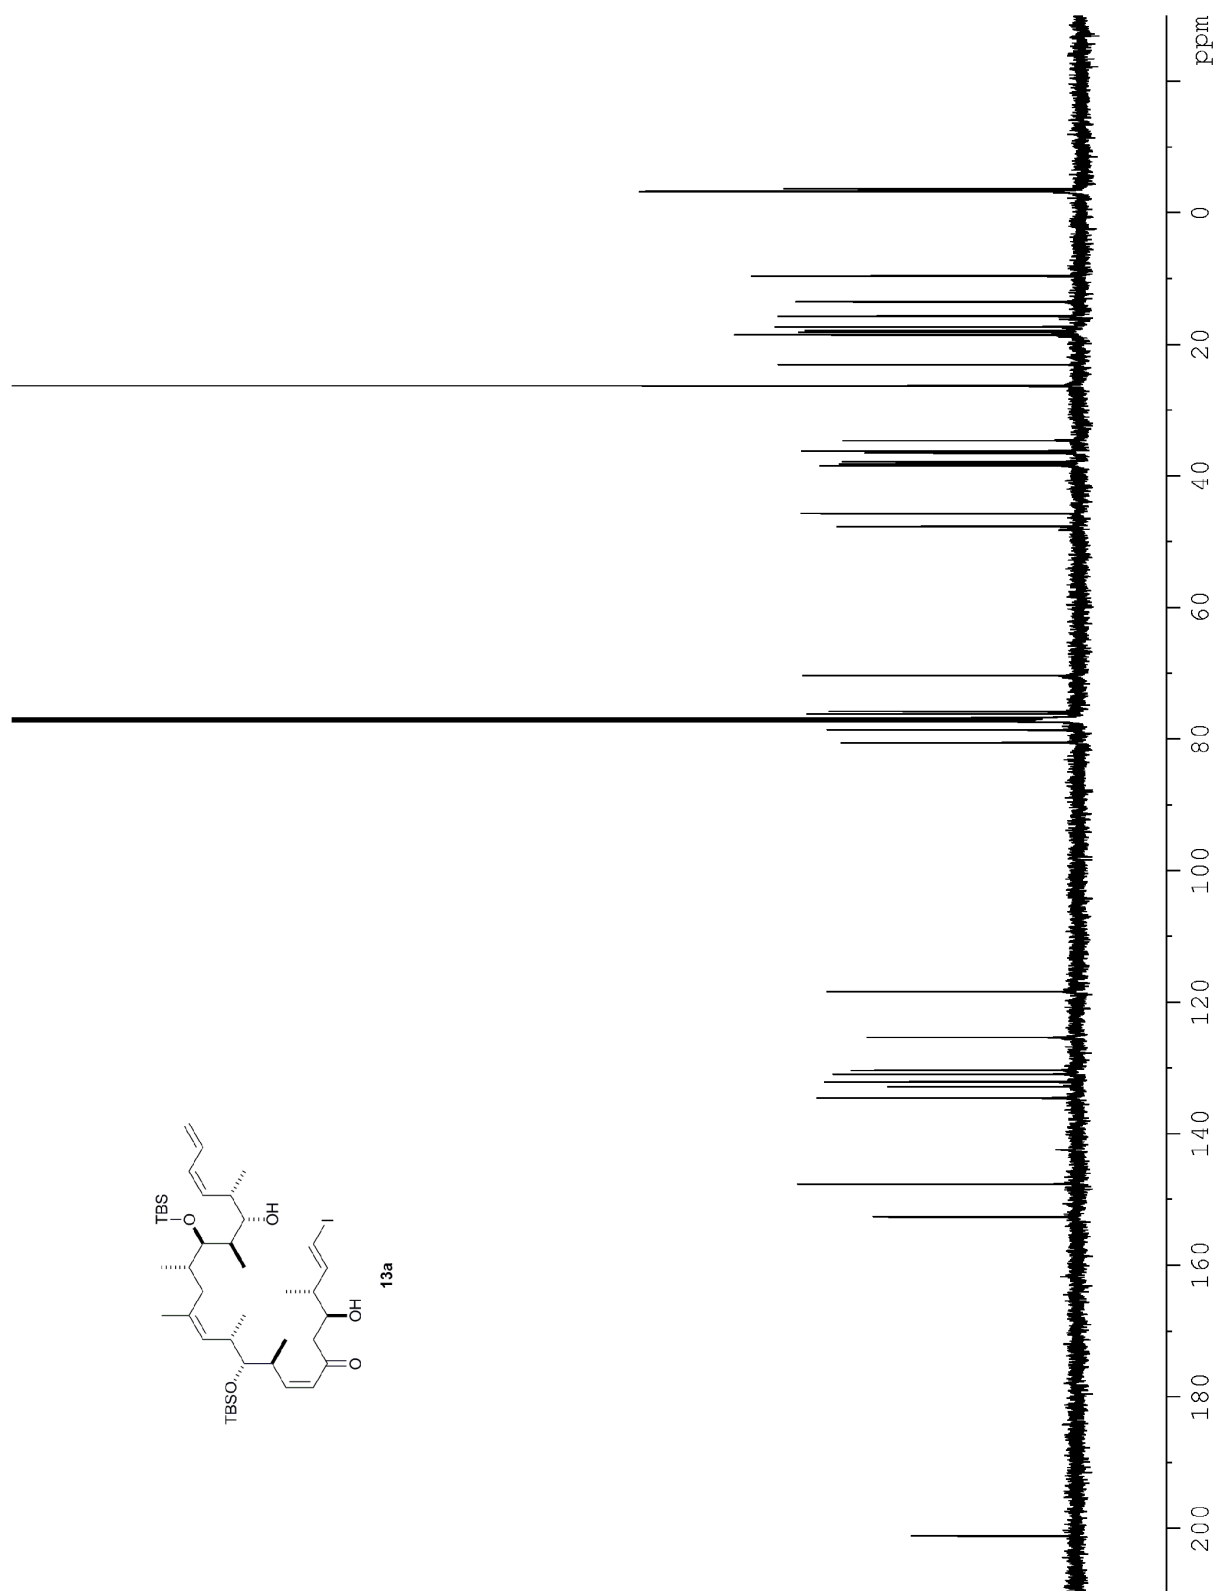

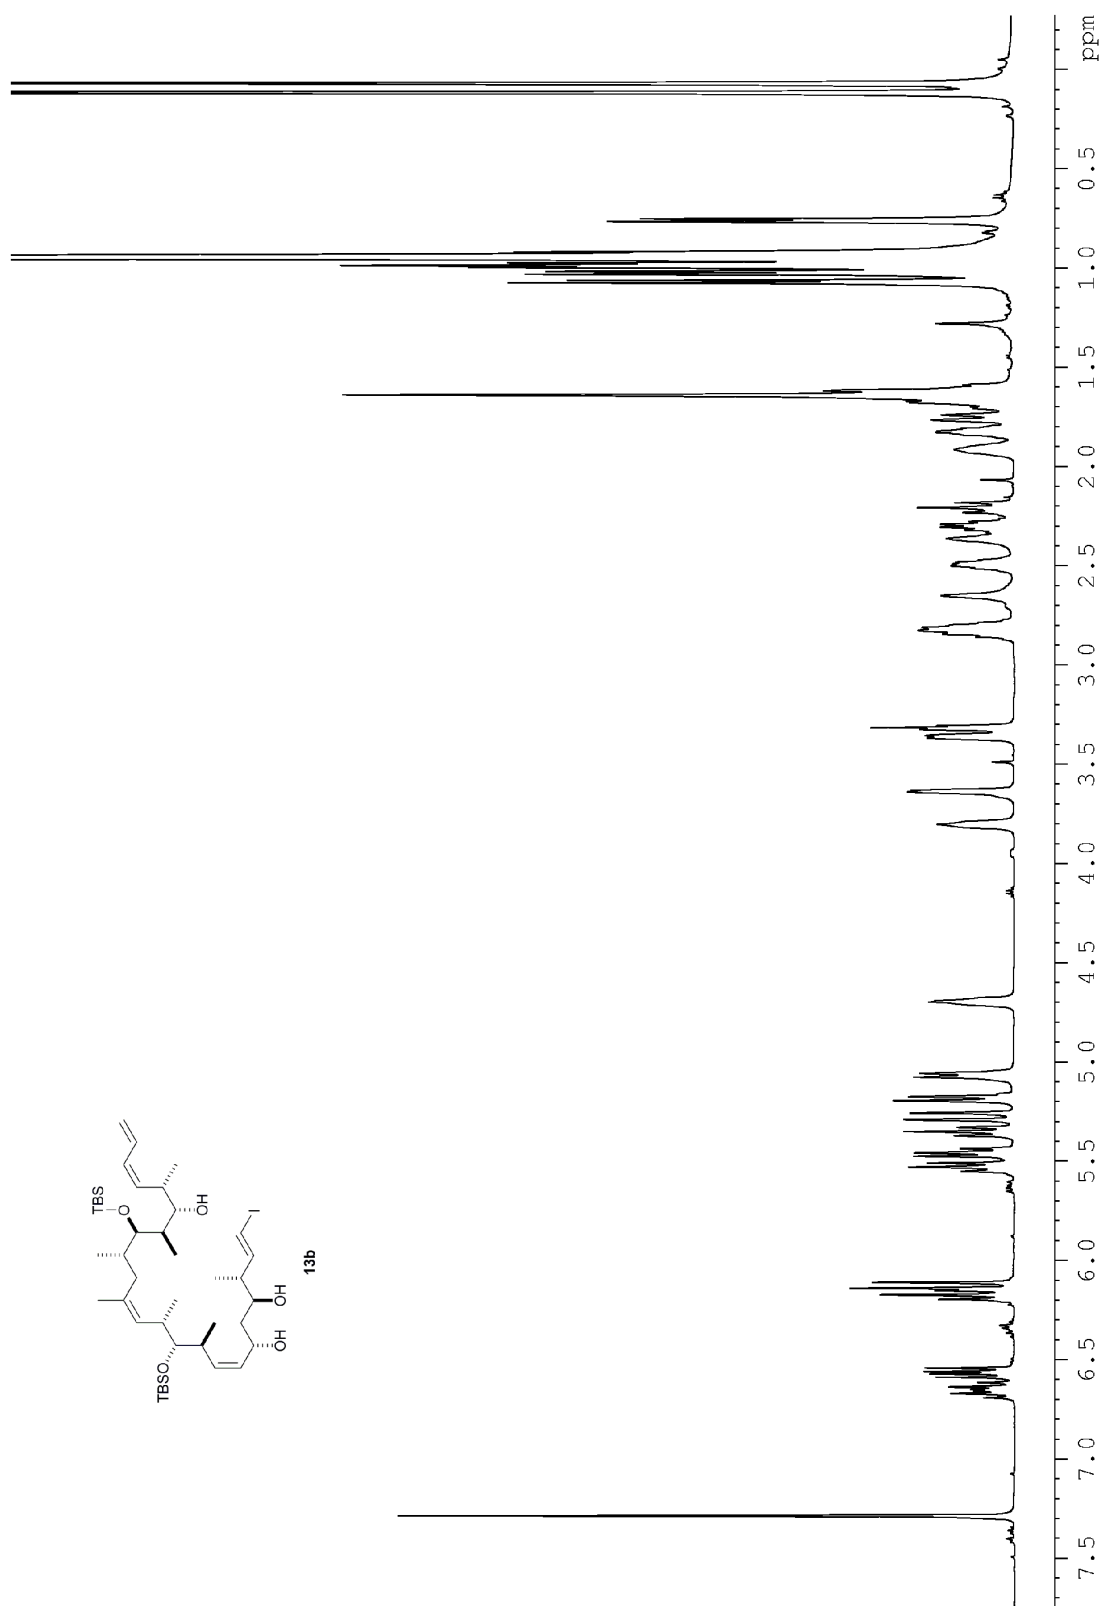

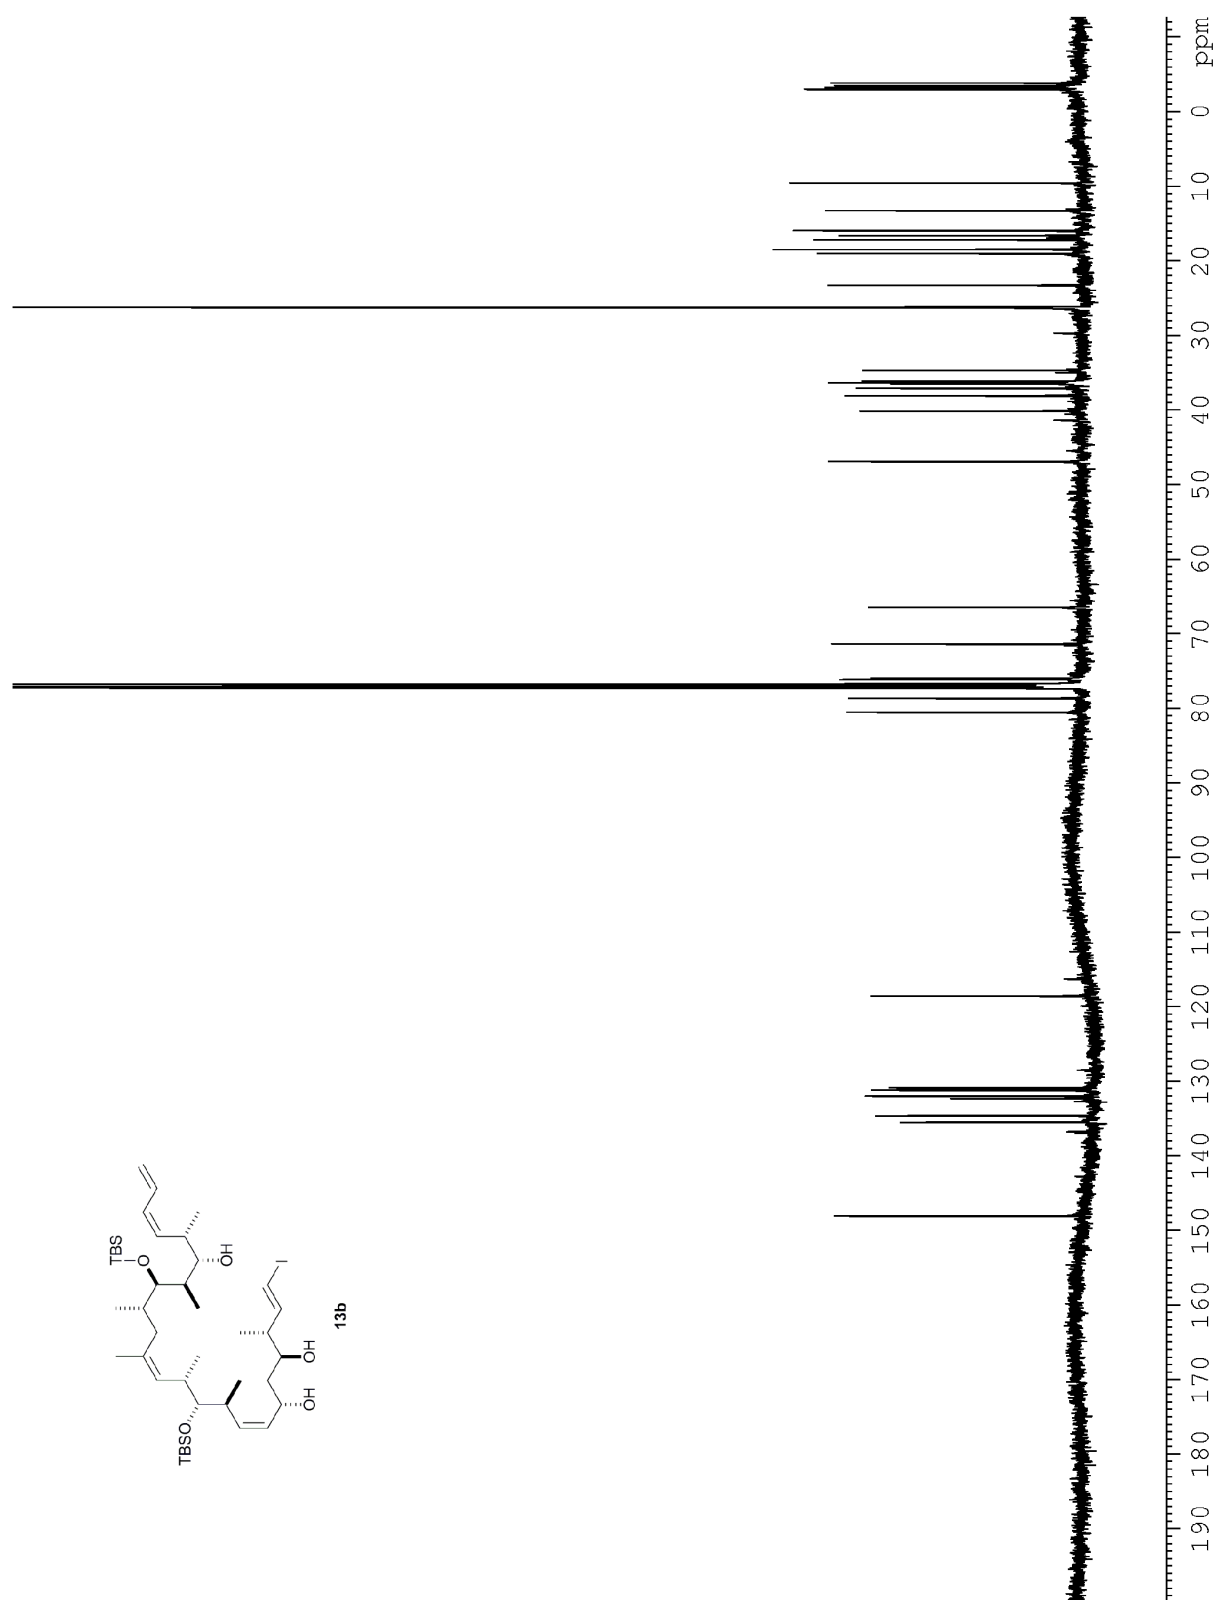

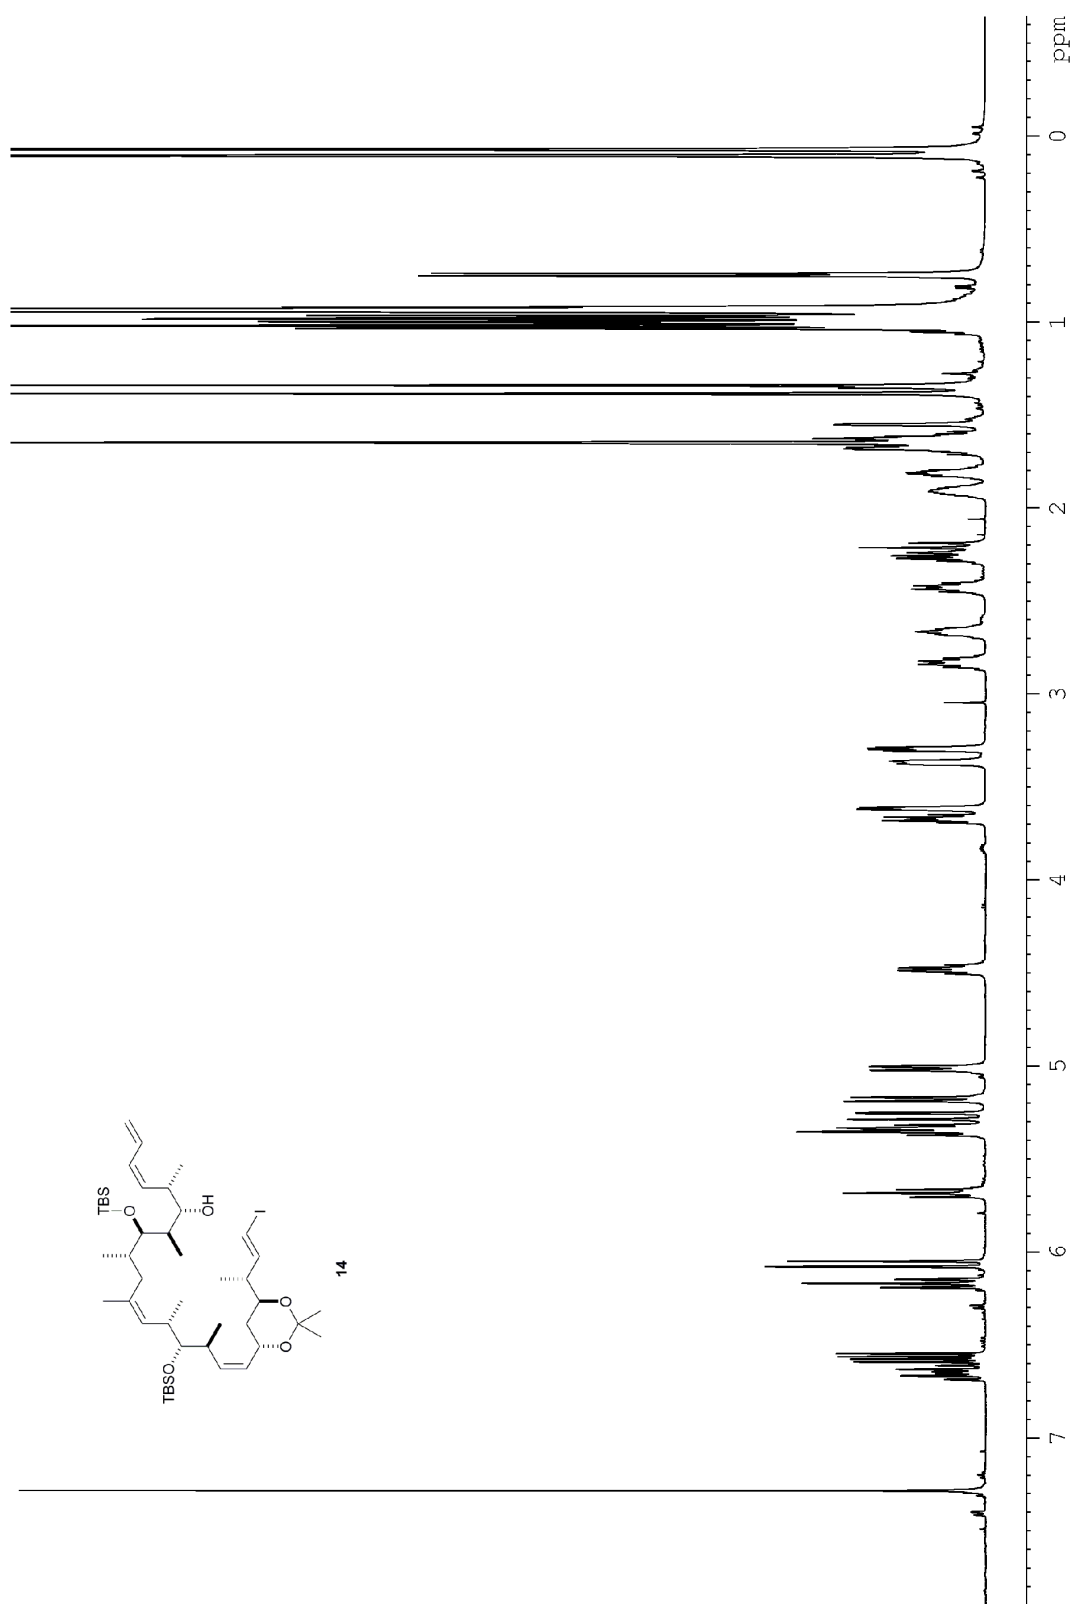

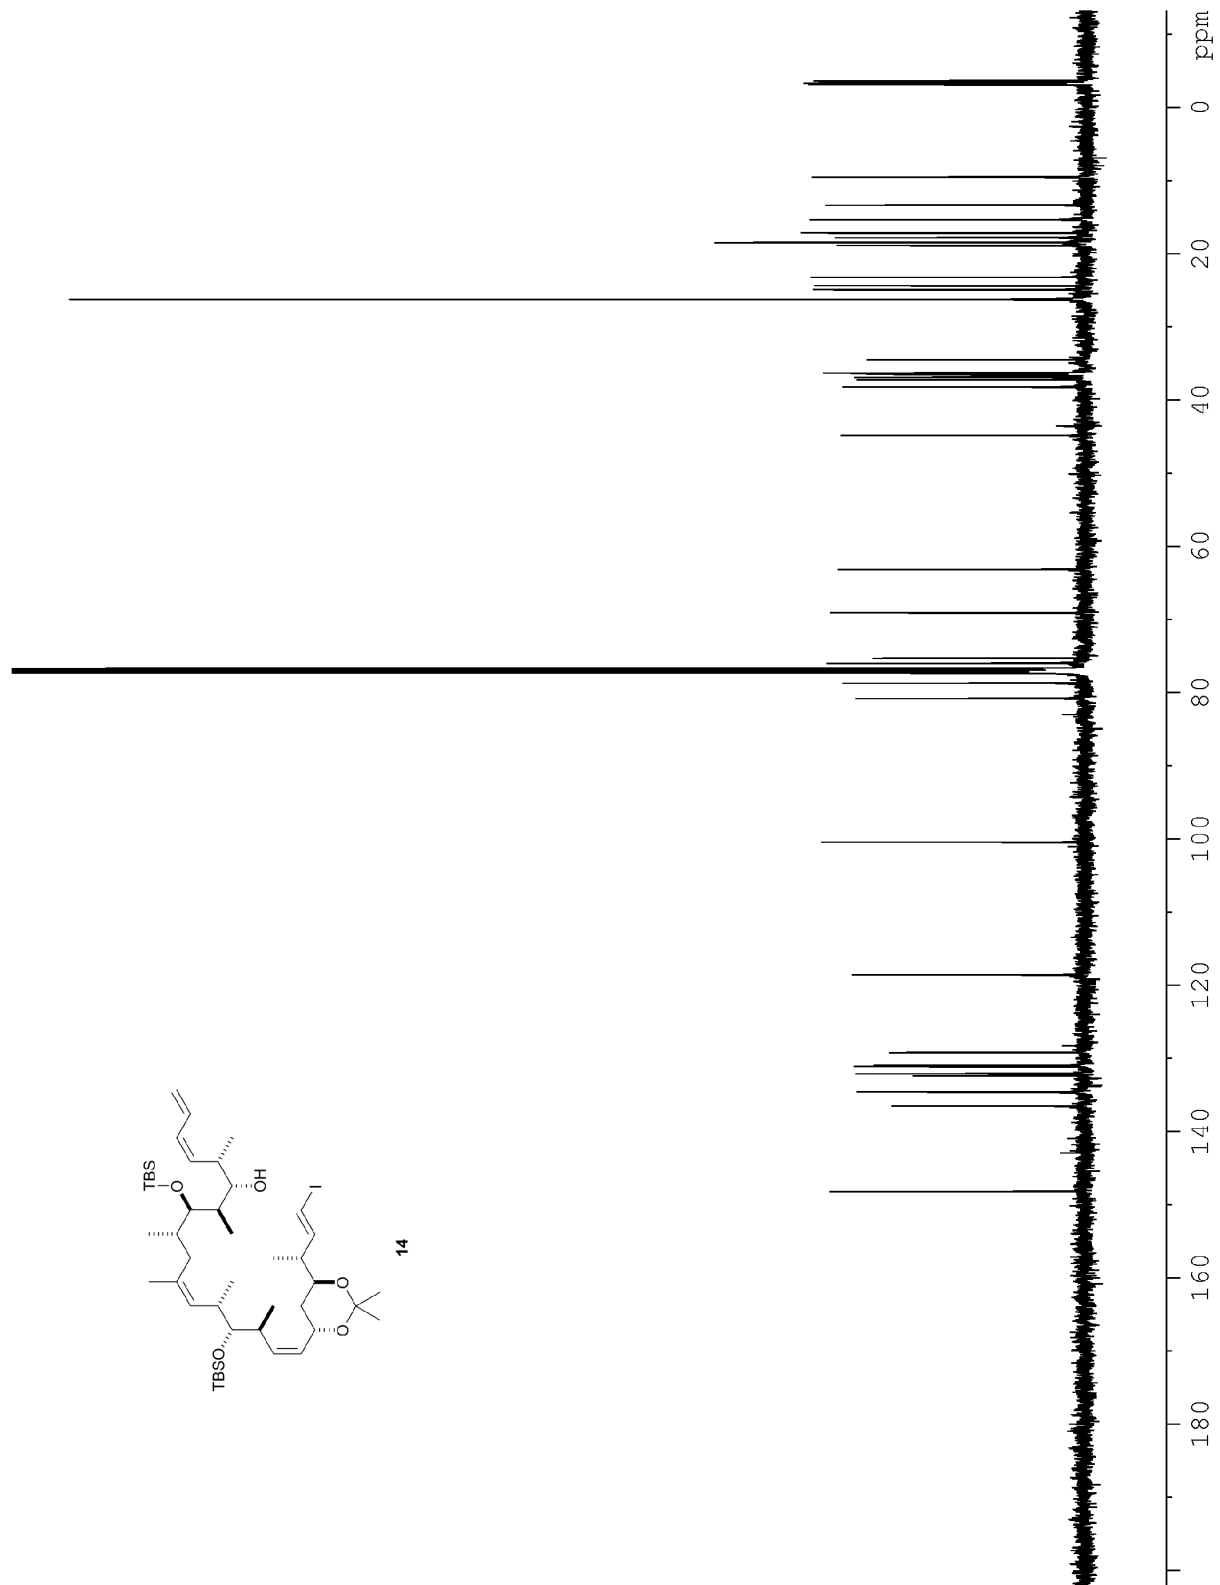

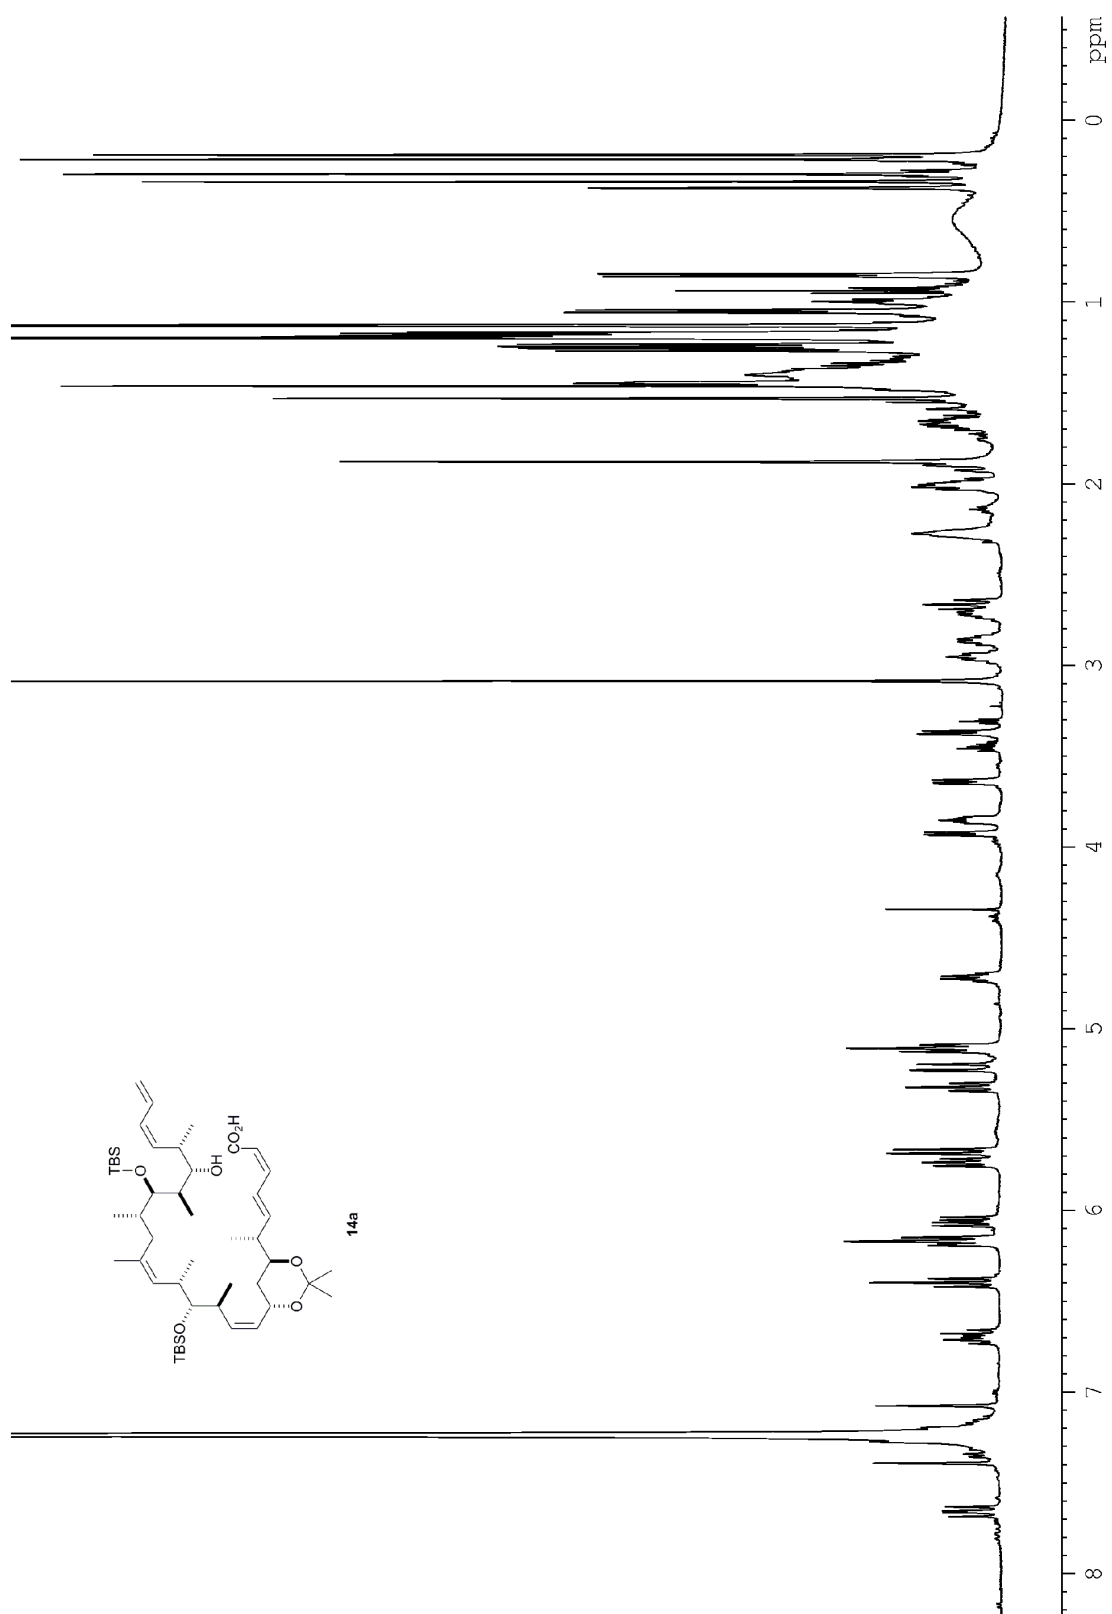

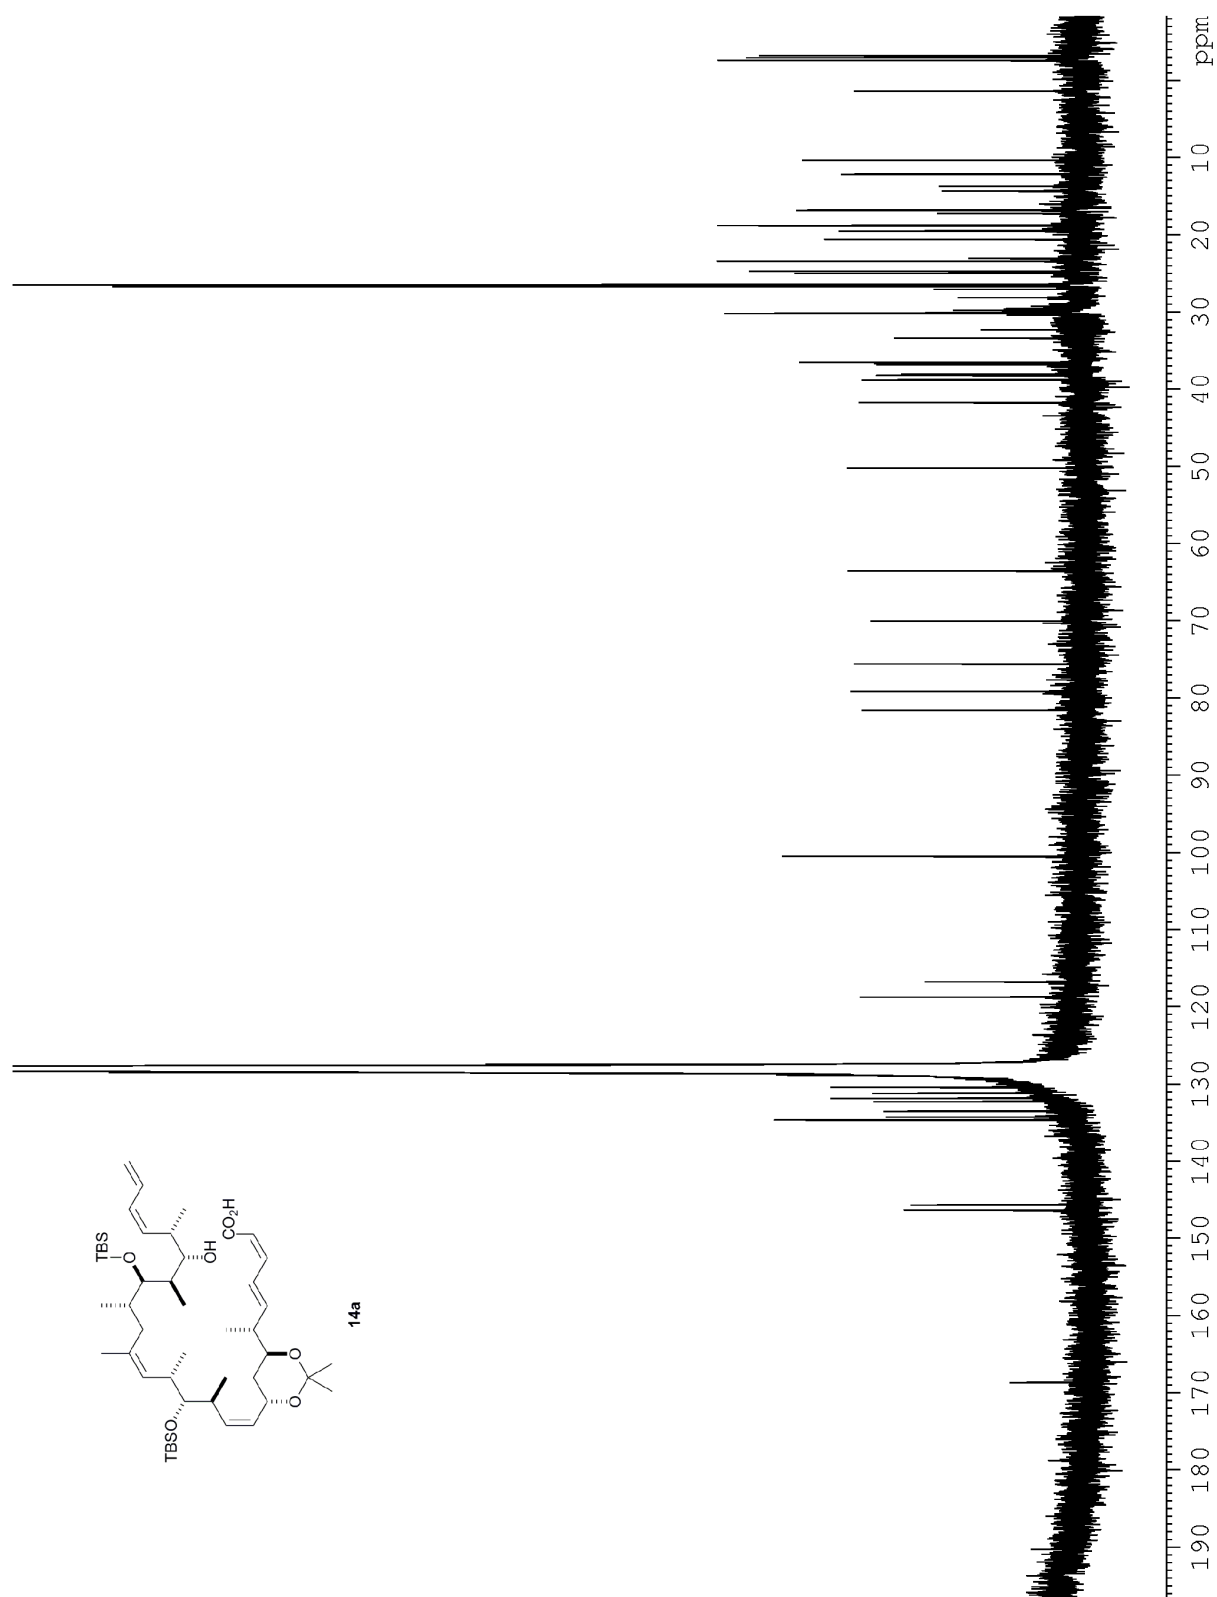

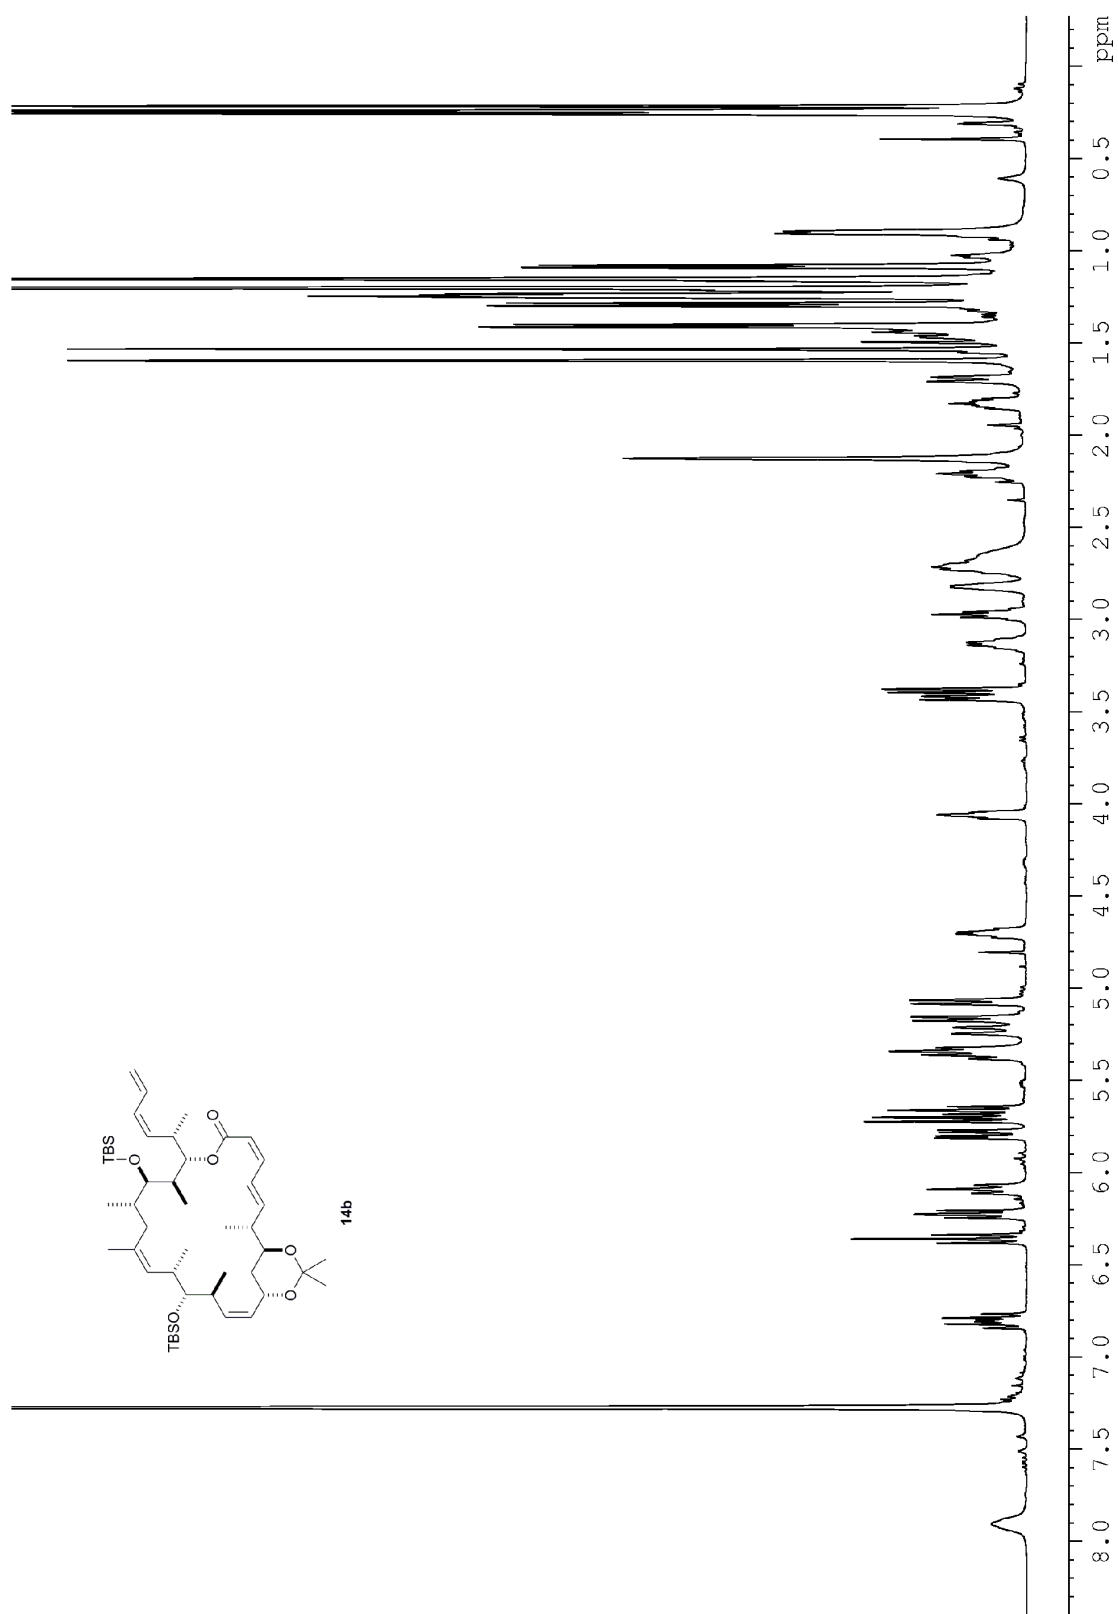

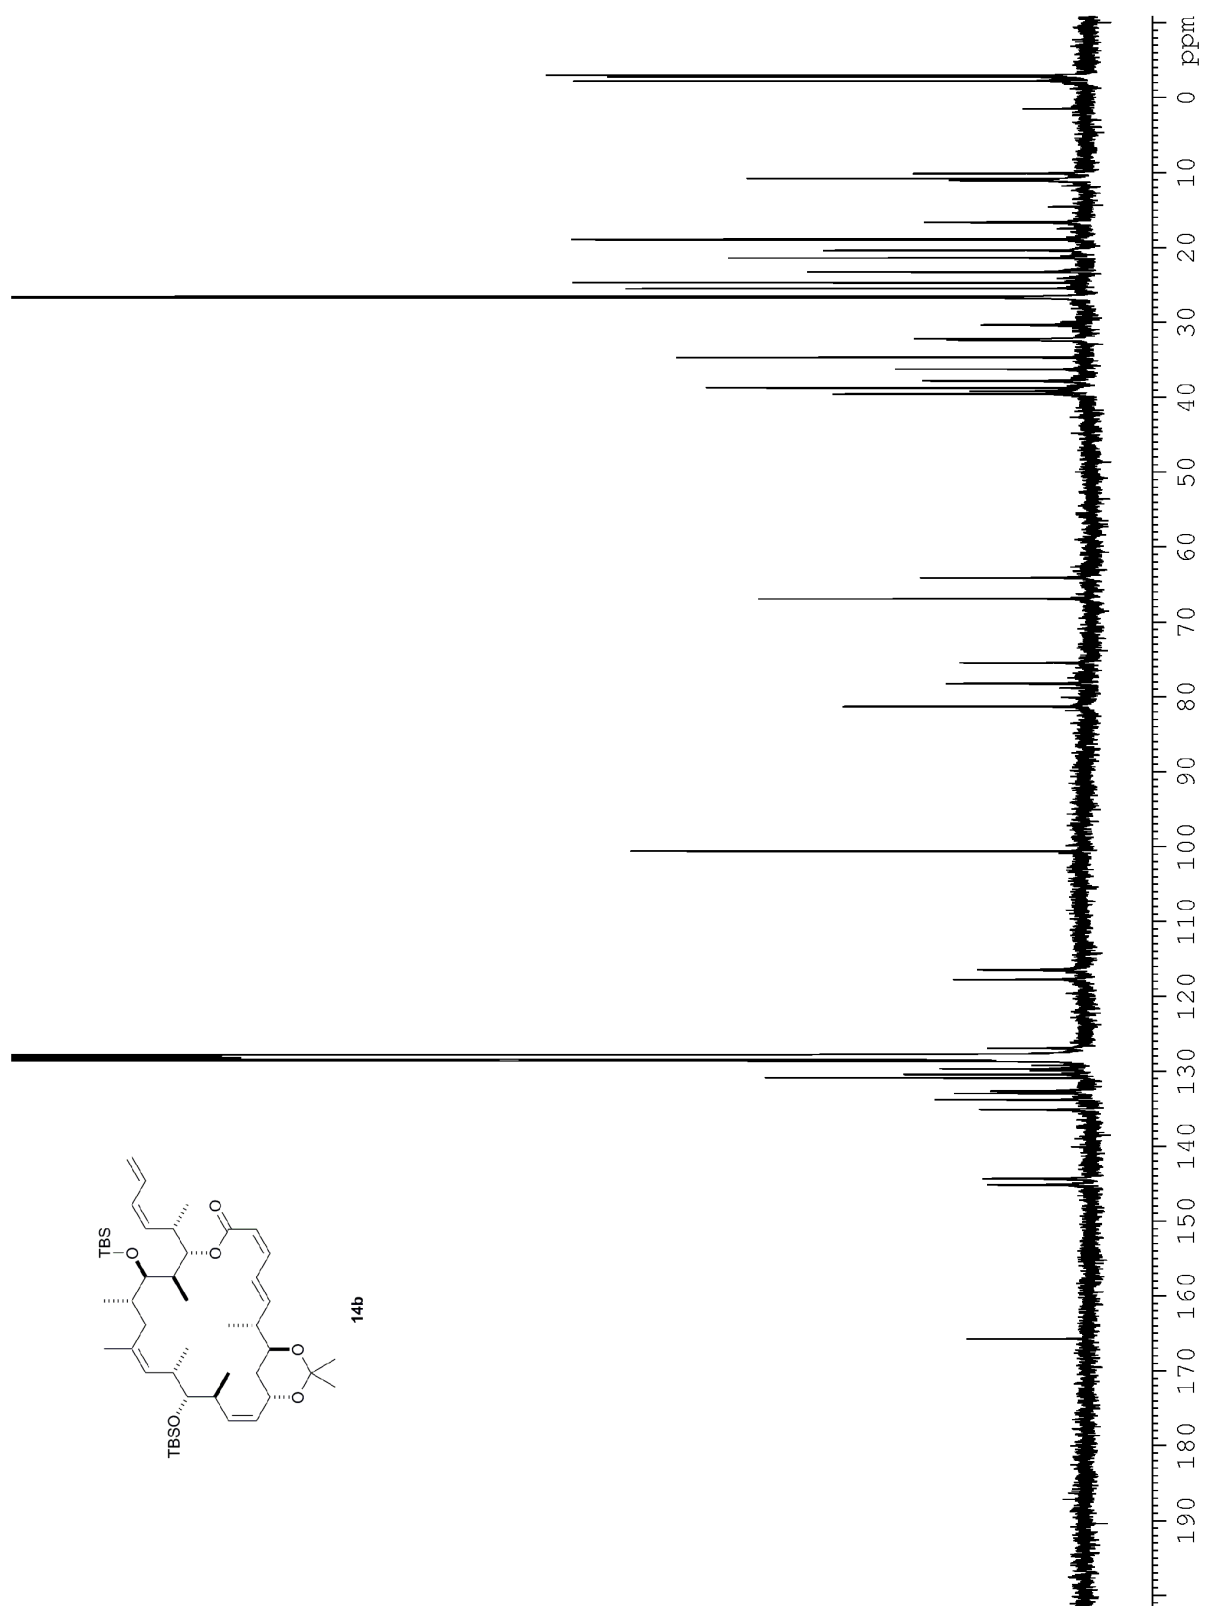

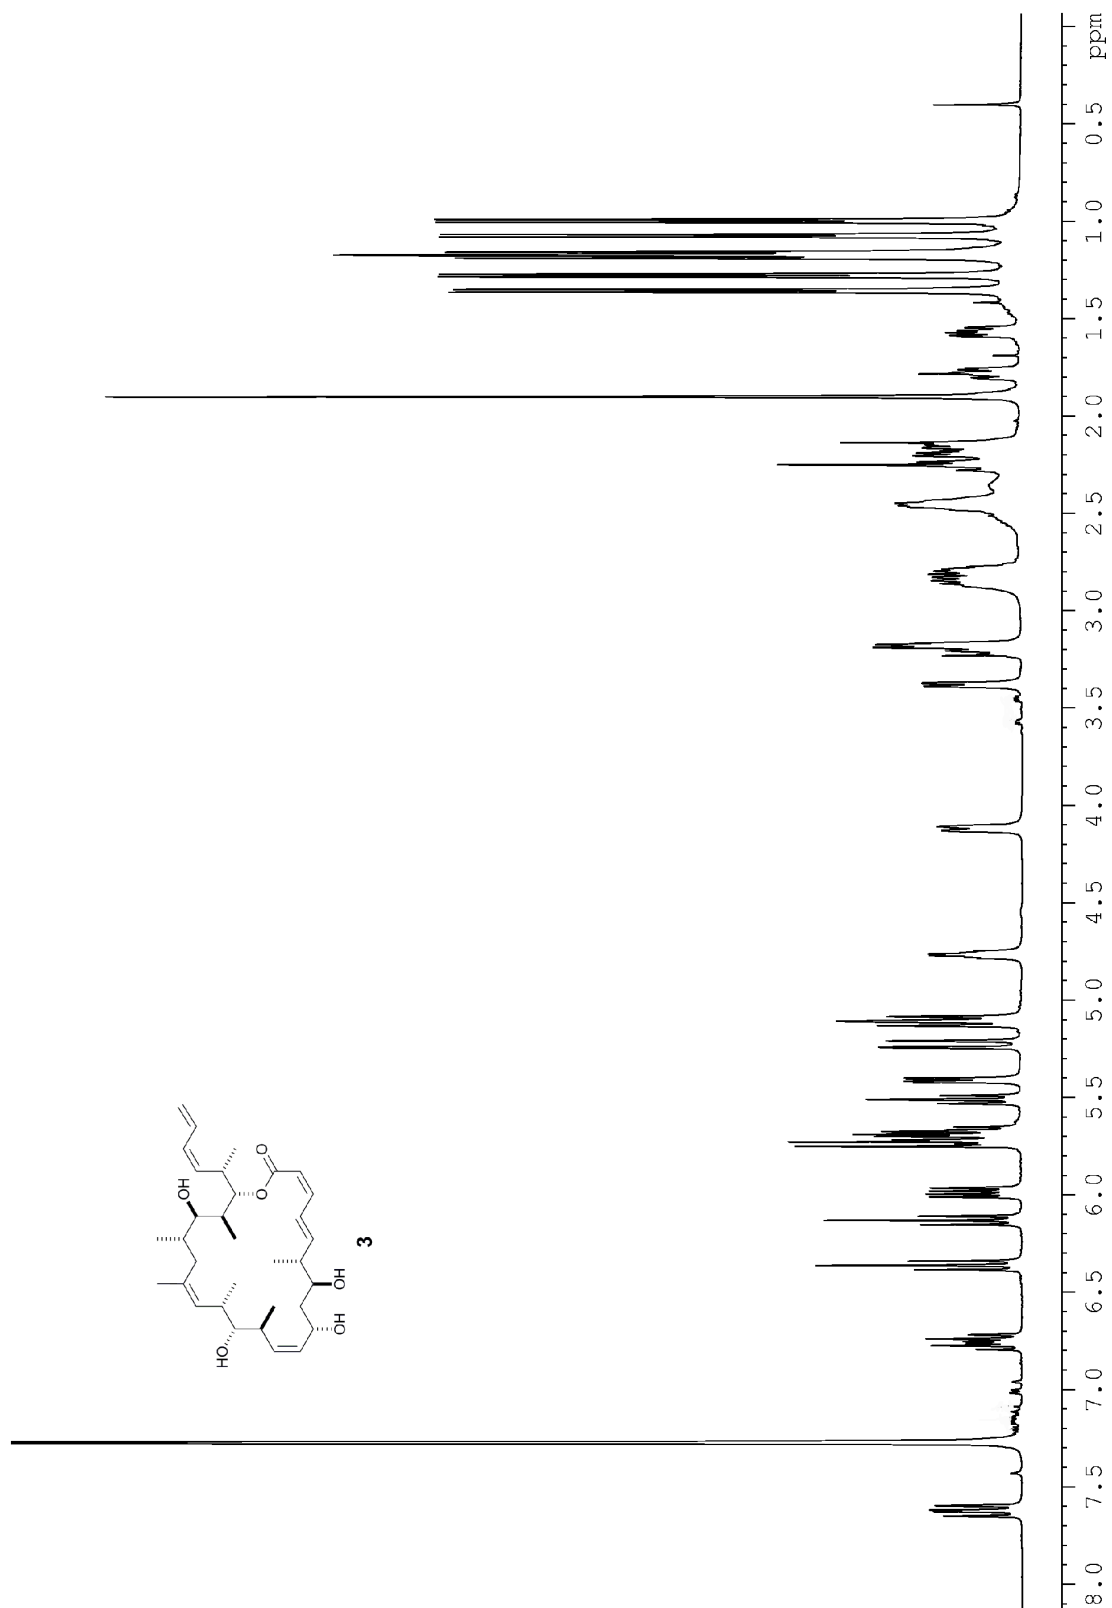

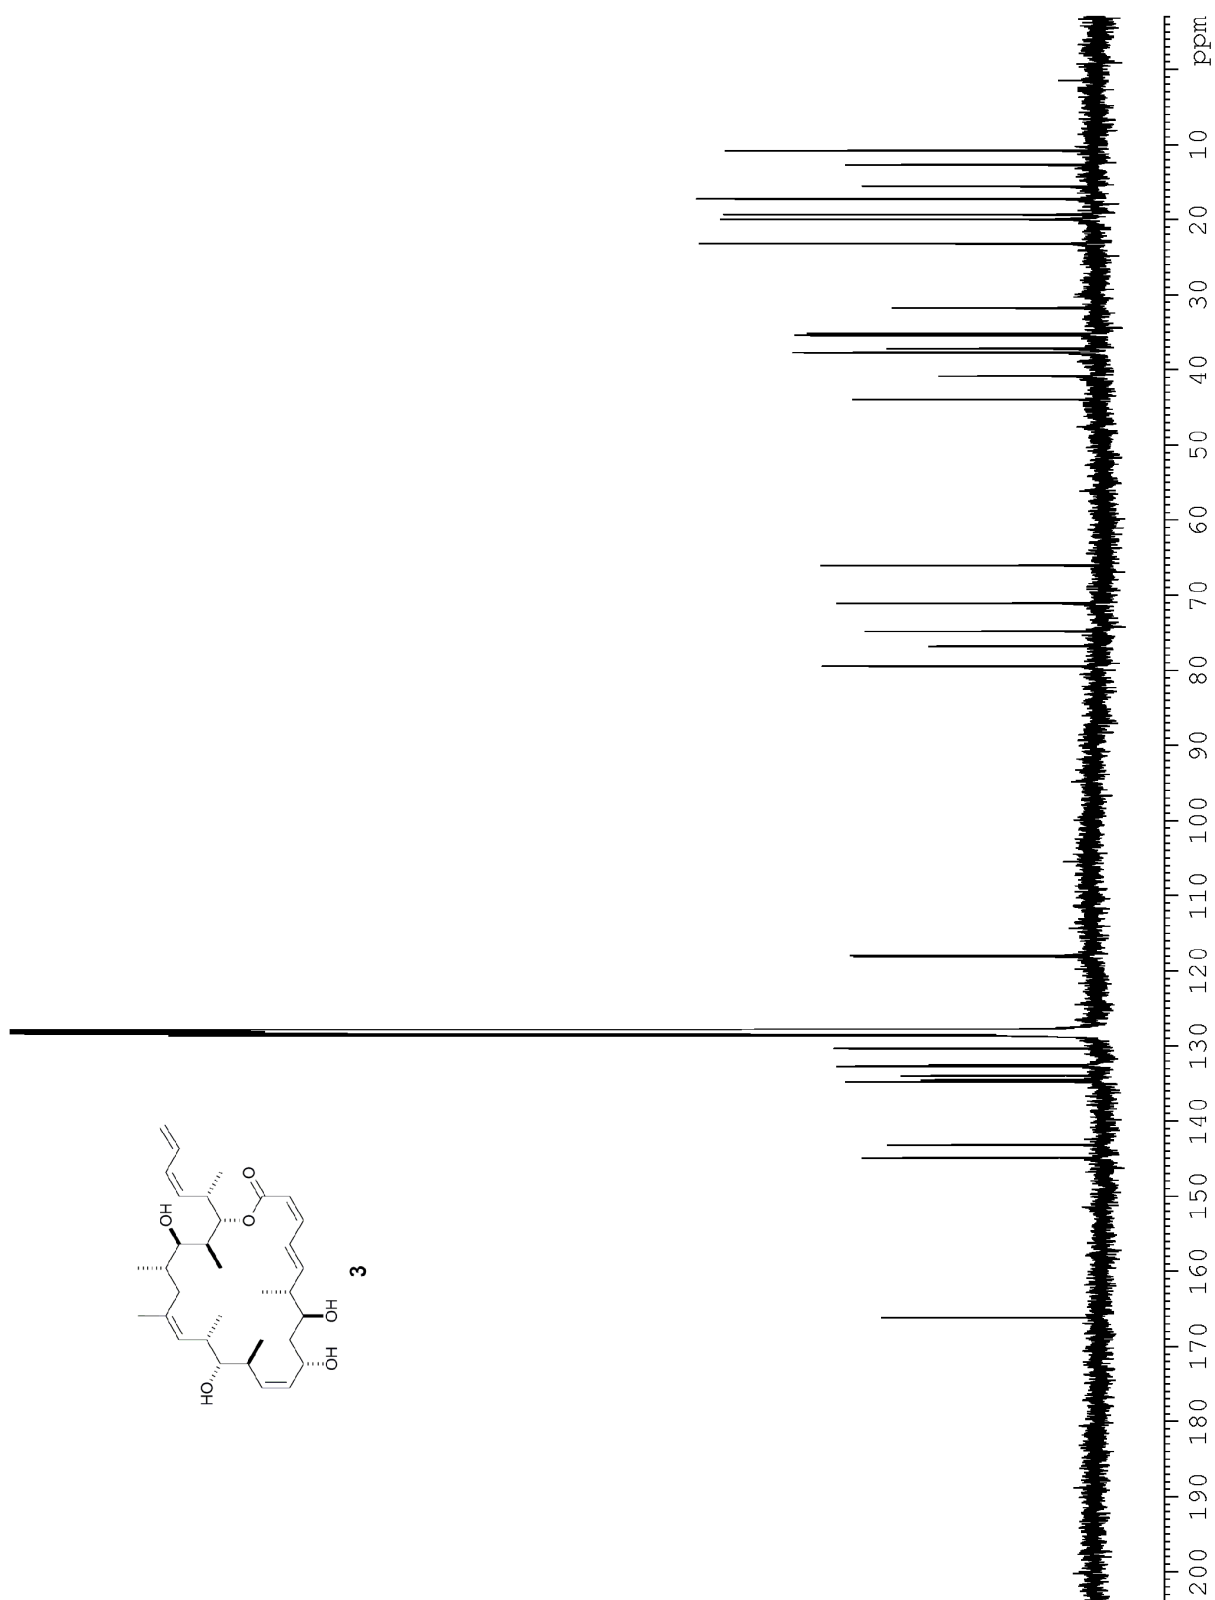

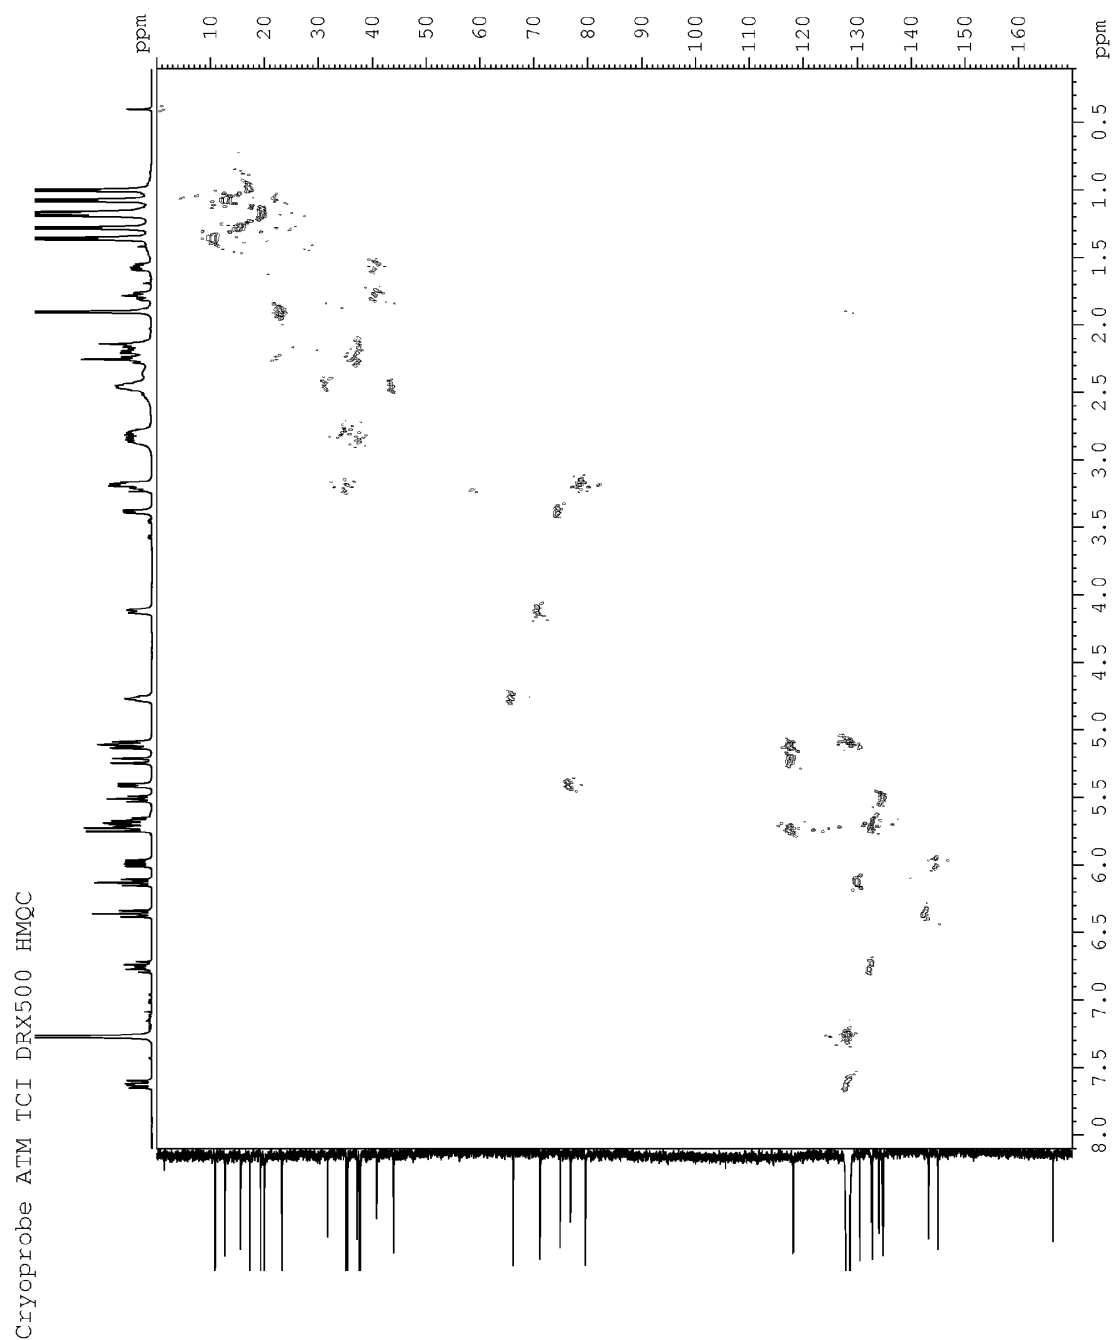

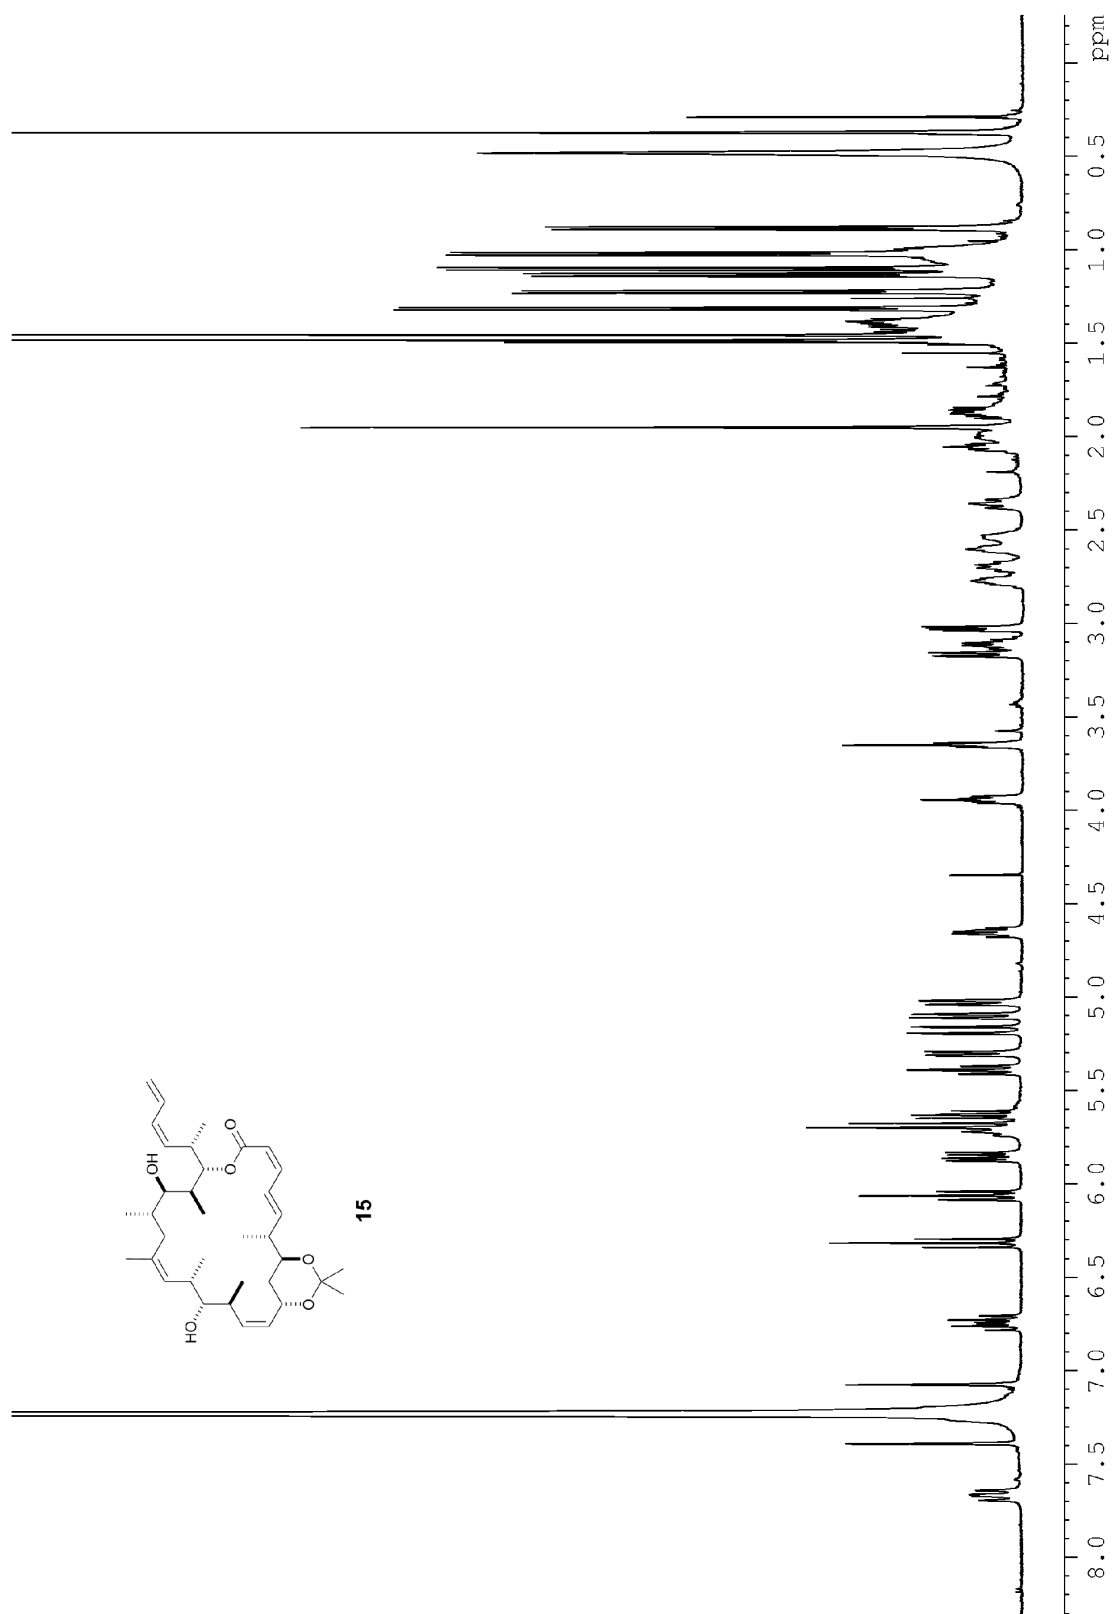

Supplement: spectra_esi.pdf [file spectra_esi.pdf]
